# Supplementary material for: Room temperature deposition of ultra sharp ZnO nanospike arrays on metallic, non-metallic and flexible carbon fabrics: Efficient field emitters
Source: Royal Society of Chemistry journal article supplement (doi:10.1039/c0ce00618a), 2010-12-22
Supplement: c0ce00618a.pdf [file c0ce00618a.pdf]

**Supplementary information:**

**Deposition of ultra sharp ZnO nanospikes array at room temperature over metallic, non-metallic, flexible carbon fabrics: Efficient field emitter**

Uday N. Maiti, Soumen Maiti, Debabrata Sarkar and Kalyan K. Chattopadhyay\*

Thin Films and Nanoscience Laboratory, Department of Physics, Jadavpur University

Kolkata 700032( India)

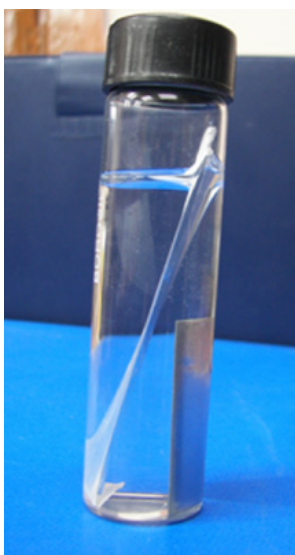

**Fig. S1:** Digital image of the deposition set up.

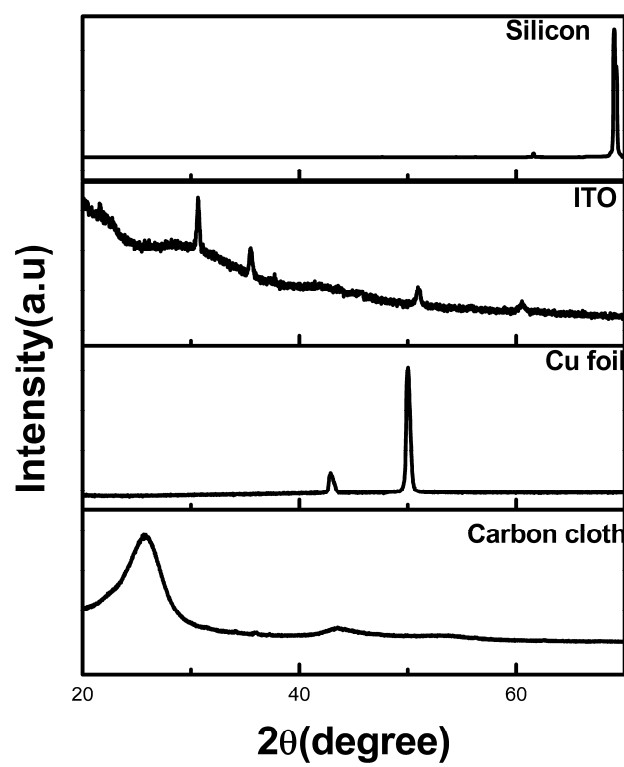

**Fig. S2:** XRD pattern of the bare substrate only.

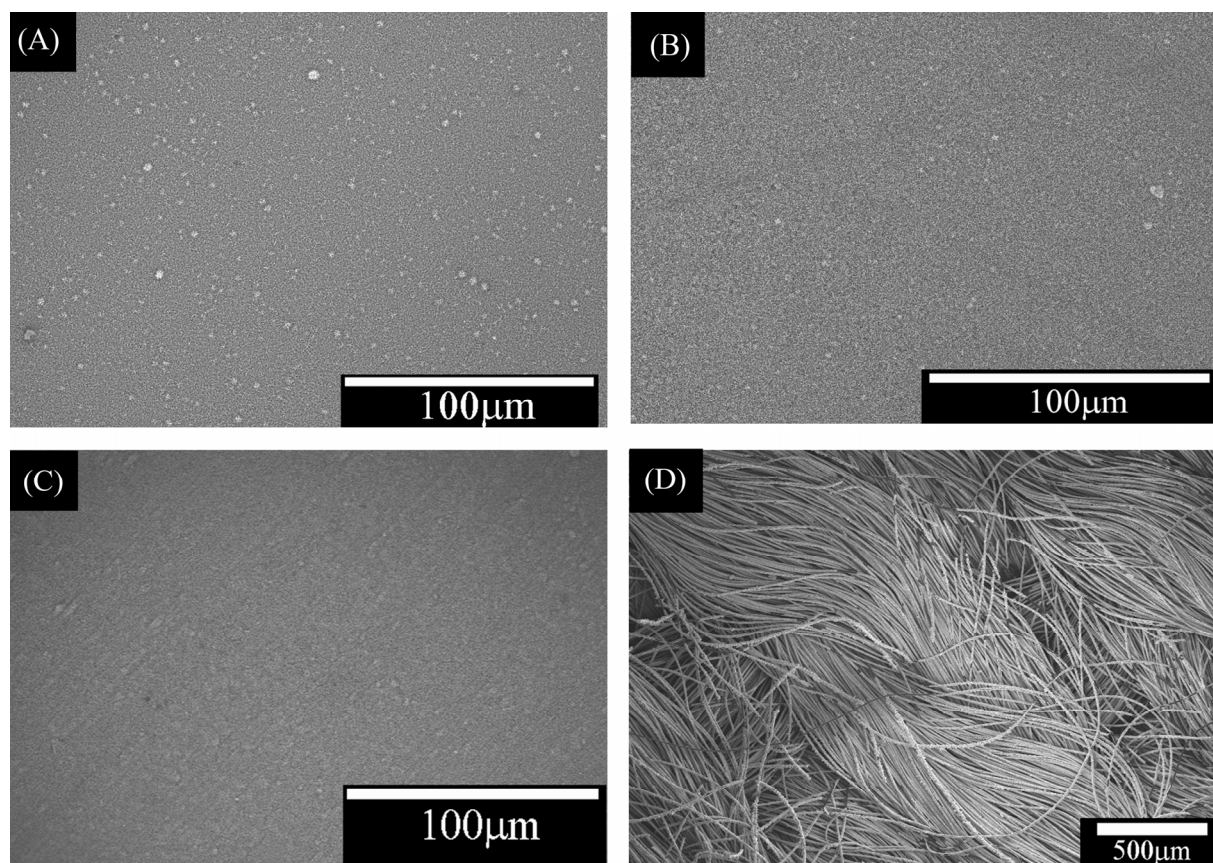

**Fig. S3:** Very low magnification FESEM image of the sample on (A) a-Si (B) a-ITO (C) a-Cu (D) a-carbon cloth.

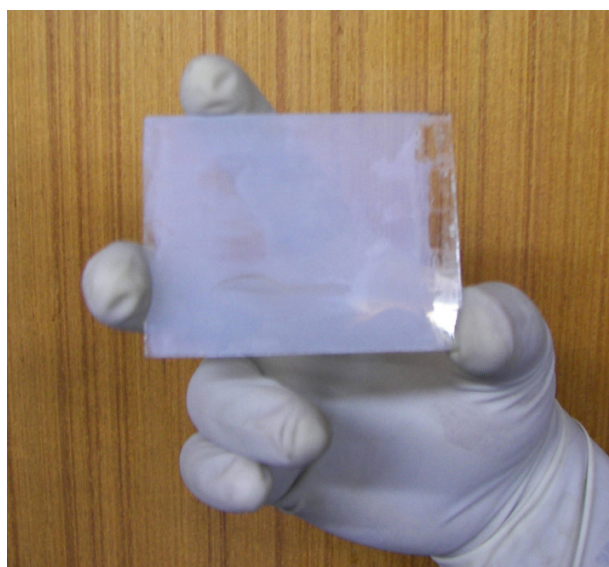

**Fig. S4:** Digital image of the film deposited on large glass substrate (6.5 cm x 5 cm)

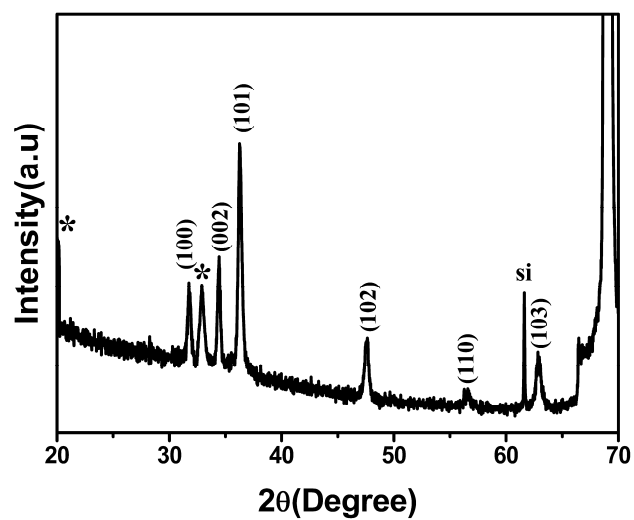

**Fig. S5:** XRD pattern of the sample deposited with low KOH (2.25g).

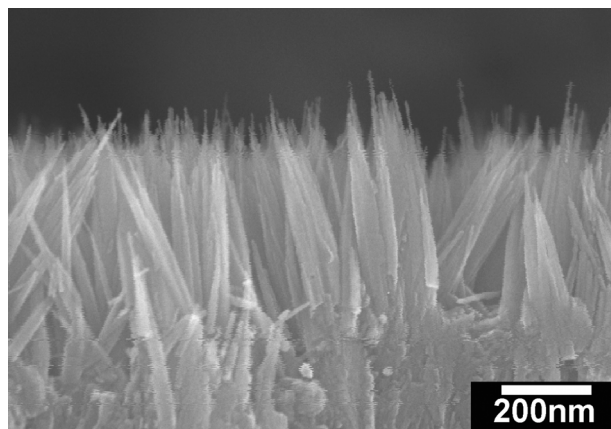

**Fig. S6:** ZnO spikes covering over zinc foil

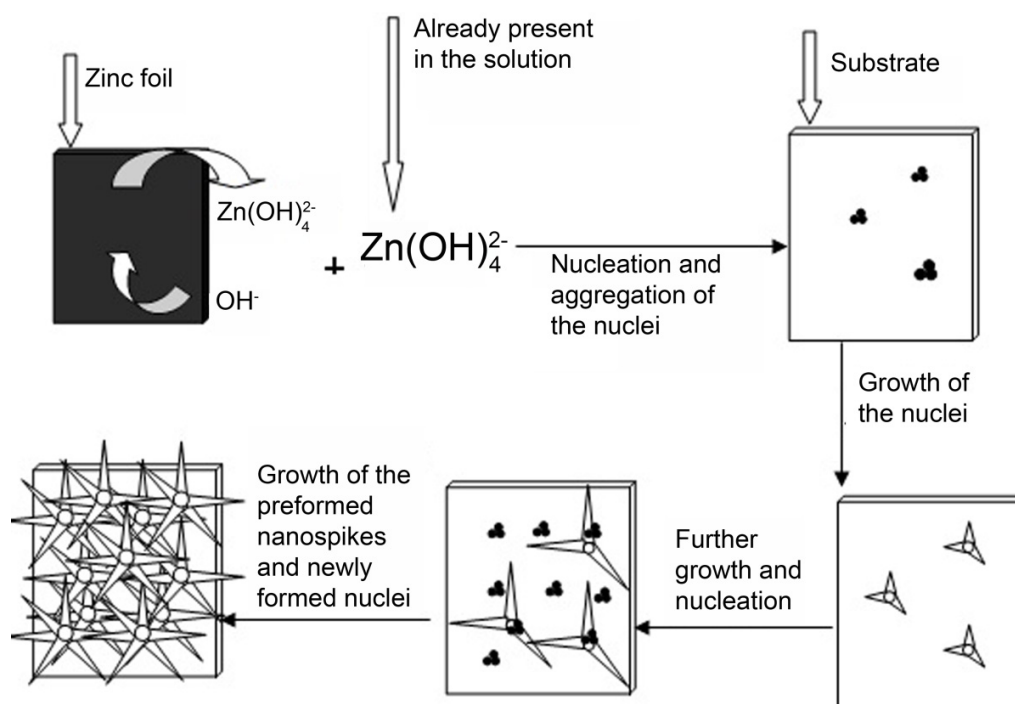

**Fig. S7:** Schematic of the growth mechanism
